# Supplementary material
Source: publisher figshare collection journal article supplement (https://acs.figshare.com/ndownloader/files/5169853)
Supplement: Supplementary file 1 [file 5169853]

# Supporting Information

## The Distance Dependence of Colloidal Au-Amplified

### Surface Plasmon Resonance

Lin He<sup>‡\*</sup>, Emily A. Smith<sup>§</sup>, Michael J. Natan<sup>†</sup> and Christine D. Keating<sup>\*</sup>

Department of Chemistry

The Pennsylvania State University

University Park, PA 16802-6300

\*: Corresponding Authors:

lin\_he@ncsu.edu; 1-919-515-2993;

keating@chem.psu.edu; 1-814-863-7832

‡: Current address: Department of Chemistry,  
North Carolina State University, Raleigh, NC 27695

§: Current address: Department of Chemistry,  
University of Arizona, Tucson, AZ 85721

†: Current address: Nanoplex Technologies, Inc.  
1430 O'Brien Drive, Menlo Park, CA 94025-1432

To be submitted to *J. Phys. Chem. B*.

**Table I. Comparison of SiO<sub>2</sub> film thickness (nm) measured with different techniques.**

| <b>QCM<sup>a</sup></b> | <b>Ellipsometry</b> | <b>AFM<sup>b</sup></b> | <b>Average<sup>c</sup></b> |
|------------------------|---------------------|------------------------|----------------------------|
| 5                      | 4.2                 | 8                      | 6                          |
| 15                     | 14                  | 17                     | 16                         |
| 20                     | 19                  | 19                     | 19                         |
| 25                     | 22                  | 22                     | 22                         |
| 30                     | 26                  | 27                     | 27                         |
| 35                     | 29                  | 30                     | 30                         |
| 40                     | 33                  | 36                     | 35                         |
| 45                     | 37                  | 38                     | 38                         |
| 50                     | 41                  | 43                     | 42                         |
| 55                     | 49                  | 49                     | 49                         |

<sup>a</sup>QCM: quartz crystal microbalance inside the thermoevaporator.

<sup>b</sup>AFM: atomic force microscope.

<sup>c</sup>Calculated average from Ellipsometry and AFM results.

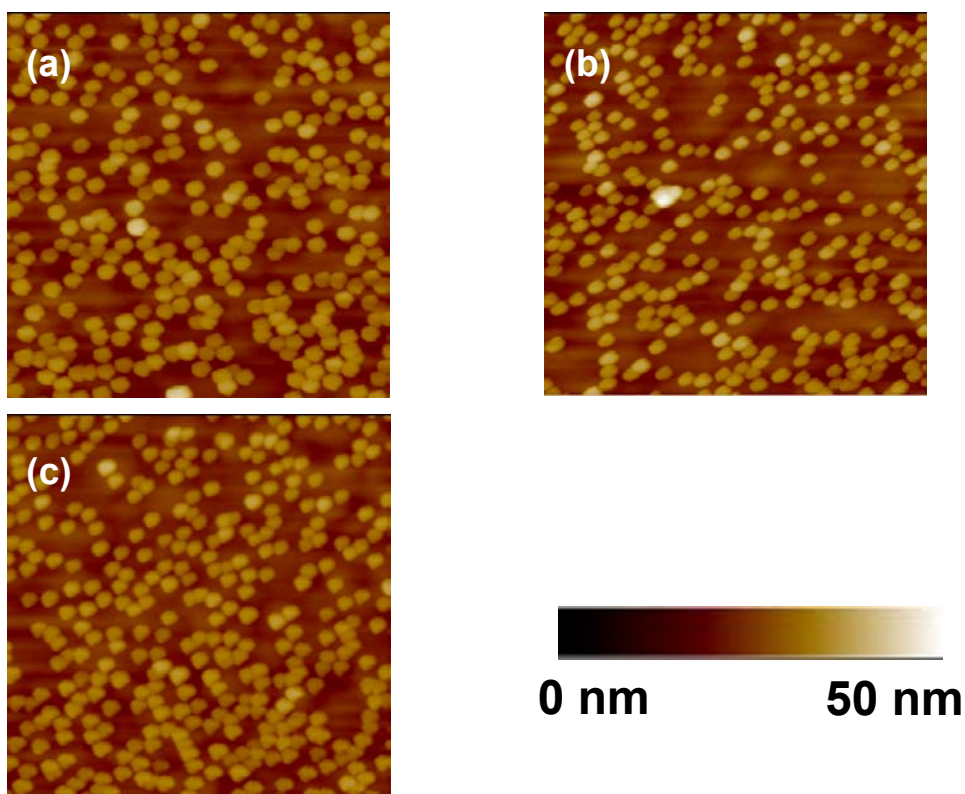

**Supporting Information 2.** Atomic force microscopic images of SPR substrates with (a) 15 nm, (b) 25 nm, and (c) 35 nm thick SiO<sub>2</sub> as the spacer. The surface coverage is at  $3 \times 10^{10}$  colloidal Au particles/cm<sup>2</sup> with less than 10% deviation. Please note that the particles in the images appear larger than their actual sizes, mainly due to the artifacts of the AFM tip. The size of the particles was determined using TEM, and the surface coverage was calculated by a manual counting.

He et. al., “.The Distance Dependence of Colloidal Au-Amplified...”, Supporting Information 2.

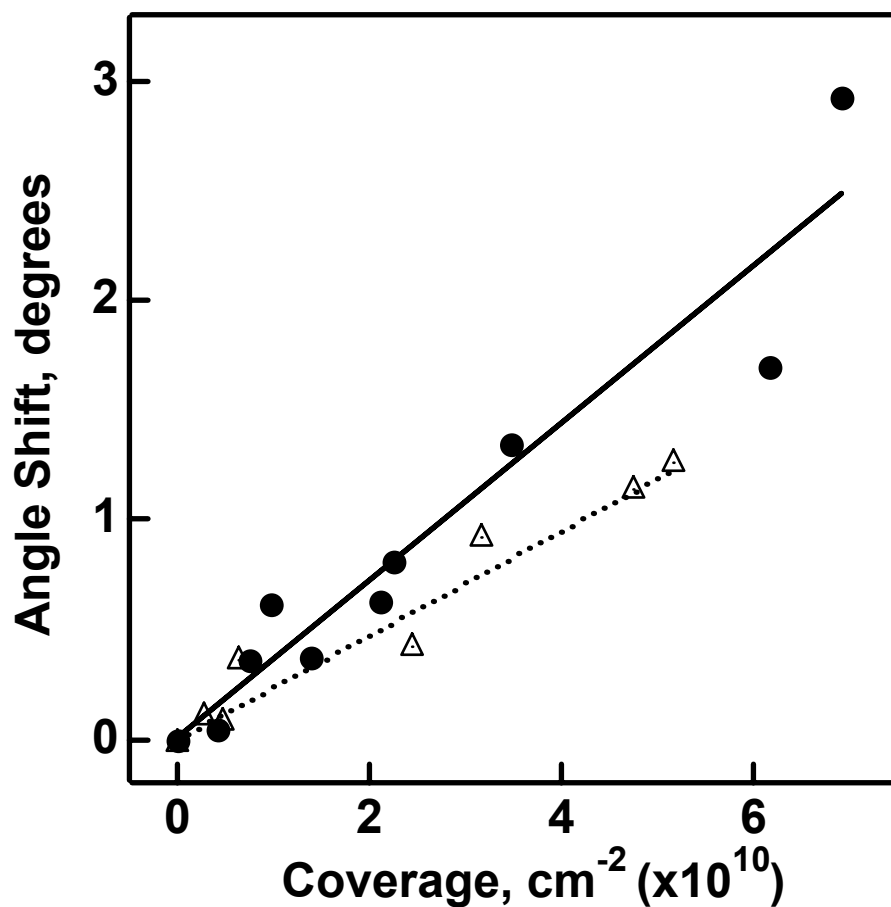

**Supporting Information 3.** The SPR angle shifts as functions of particle coverage on a bare Au surface ( $\Delta$ ) and a 25-nm  $\text{SiO}_2$ -coated Au surface ( $\bullet$ ). Particles were immobilized using APTMS chemistry directly atop  $\text{SiO}_2$  overlayer.

He et. al., “.The Distance Dependence of Colloidal Au-Amplified...”, Supporting Information 3.
